# Supplementary material for: Geriatric Depression and Cognitive Impairment—An Update
Source: PubMed Central journal article supplement — Indian J Psychol Med. 2021 Jan 21;43(4):286–93. doi: 10.1177/0253717620981556 (PMC8327864; doi:10.1177/0253717620981556), 2021-01-21
Supplement: Suppl_Table_S1_ed_TS.pdf [file Suppl_Table_S1_ed_TS.pdf]

**Table S1. Original Studies on Cognitive Deficits in Late-Life Depression (2011–2019).**

| Author, Year                         | Country | Setting, Design                         | Objectives of the Study                                                                                                                         | Age Group, Sample Size                                     | Diagnosis of Depression           | Cognitive Assessments                                          | Main Results                                                                                                                                                                                                                                                                                                   |
|--------------------------------------|---------|-----------------------------------------|-------------------------------------------------------------------------------------------------------------------------------------------------|------------------------------------------------------------|-----------------------------------|----------------------------------------------------------------|----------------------------------------------------------------------------------------------------------------------------------------------------------------------------------------------------------------------------------------------------------------------------------------------------------------|
| Novaretti et al., <sup>13</sup> 2011 | Brazil  | Hospital-based study<br>Cross-sectional | To compare the profiles of language abilities in late-onset depression and mild AD groups.                                                      | LOD—25<br>Mild AD—30<br>Controls—30                        | <i>DSM-IV</i><br><br>NINCDS-ADRDA | Arizona Battery for Communication Disorders of Dementia (ABCD) | Depressed patients' scores were similar to AD in confrontation naming, concept definition, following commands, repetition, and reading comprehension (sentence). Episodic memory and mental status subtests were useful in differentiating depressed patients from AD.                                         |
| Jungwirth et al., <sup>28</sup> 2011 | Austria | Prospective study                       | Investigated the influence of depression on processing speed and executive function in older adults.                                            | LOD ( $n = 287$ )                                          | <i>DSM-IV</i>                     | Trail making test (A and B), verbal fluency                    | On regression analysis, education has a positive influence and cerebral comorbidity had negative influence of executive function. Depression had only minor influence.                                                                                                                                         |
| Tam CW et al., <sup>14</sup> 2012    | China   | Cross-sectional<br>Hospital-based       | To investigate the relationship between cognitive performance and severity of depression in Chinese elderly subjects with late-onset depression | LOD ( $n = 105$ )<br>MCI ( $n = 175$ )<br>HC ( $n = 149$ ) | <i>DSM-IV</i>                     | MMSE<br>Chinese version of ADAS-Cog, neuropsychological tests  | The depression group had significantly poorer performance in all cognitive assessments compared to the normal elderly control group. The depression group had a similar cognitive profile to those with mild cognitive impairment, except that its subjects had slightly better performance in the Categorical |

|                                             |              |                                         |                                                                                                                                                                   |                                                                                                   |               |                                                 |                                                                                                                                                                                                                                                                            |
|---------------------------------------------|--------------|-----------------------------------------|-------------------------------------------------------------------------------------------------------------------------------------------------------------------|---------------------------------------------------------------------------------------------------|---------------|-------------------------------------------------|----------------------------------------------------------------------------------------------------------------------------------------------------------------------------------------------------------------------------------------------------------------------------|
|                                             |              |                                         |                                                                                                                                                                   |                                                                                                   |               |                                                 | Verbal Fluency Test, delayed recall testing.                                                                                                                                                                                                                               |
| Sachs-Ericsson et al., <sup>23</sup> 2013   | Florida, USA | Prospective, Outpatient based           | To determine if LOD, compared with EOD, would demonstrate more cognitive and neuroimaging changes.                                                                | Age >60 years<br>EOD ( $n = 65$ )<br>LOD ( $n = 70$ )                                             | <i>DSM-IV</i> | MMSE<br>MADRS                                   | The LOD group exhibited a greater decline in cognitive scores during the 4-year follow-up. There is decreased right cerebral gray matter in LOD group.                                                                                                                     |
| Richard-Devantoy et al., <sup>16</sup> 2013 | Canada       | Cross-sectional study<br>Hospital-based | To compare cognitive inhibition performance between people with early-onset (EOD) or late-onset depression (LOD) and controls, and between women and men with LOD | Women EOD ( $n = 10$ )<br>Women LOD ( $n = 10$ )<br>Women HC ( $N = 10$ )<br>Men LOD ( $n = 10$ ) | <i>DSM-IV</i> | Neuropsychological tests<br>Mainly, Stroop test | Older depressed women, irrespective of the age of onset of depression, had greater cognitive inhibition impairments (attention and verbal component) compared with healthy women. No executive function differences were found between EOD and LOD and across the genders. |
| Dybedal et al., <sup>15</sup> 2013          | Norway       | Hospital-based<br>Cross-sectional       | determine the characteristics of neuropsychological functioning in nondemented LLD patients                                                                       | LOD ( $n = 39$ )<br>controls ( $n = 18$ )                                                         | DSM-IV        | Neuropsychological tests                        | Relative to HC subjects, LLD patients performed significantly poorer in the domains of information processing speed and executive function. Nearly half of the patients had a clinically significant cognitive impairment in at least one neurocognitive domain            |

|                                      |                 |                                                            |                                                                                                                                             |                                                                                                                          |                        |                                                          |                                                                                                                                                                                                                                                                                                                                                                                         |
|--------------------------------------|-----------------|------------------------------------------------------------|---------------------------------------------------------------------------------------------------------------------------------------------|--------------------------------------------------------------------------------------------------------------------------|------------------------|----------------------------------------------------------|-----------------------------------------------------------------------------------------------------------------------------------------------------------------------------------------------------------------------------------------------------------------------------------------------------------------------------------------------------------------------------------------|
| Mackin RS et al., <sup>21</sup> 2014 | California, USA | Cross-sectional Hospital-based                             | To compare patterns of cognitive performance in older adults with late-onset depression to that of older adults with early-onset depression | Age>65<br>EOD ( $n = 99$ )<br>LOD ( $n = 72$ )                                                                           | <i>DSM-IV</i>          | Test for verbal learning, memory, and executive function | The LOD group demonstrated poorer performance on measures of verbal learning, $F(1,161) = 4.28$ , $P = 0.04$ and memory $F(1,160) = 4.65$ , $P = 0.03$ , than the EOD. Linear regression analysis demonstrated that LOD and fewer years of education were significant predictors of poorer verbal learning, $F(7,114) = 6.25$ , $P < 0.001$ and memory, $F(7,113) = 7.24$ , $P < 0.001$ |
| Disabato et al., <sup>24</sup> 2014  | USA             | Hospital-based Prospective observational study             | Compare cortical thicknesses, white matter hyperintensities, neuropsychological factors, treatment outcomes between LOD and EOD             | LOD—66<br>EOD—60<br>Older adults                                                                                         | <i>DSM-IV</i>          | Neuropsychological test at 12 weeks                      | No differences were found in neuropsychological factor scores or treatment outcome between early-onset and late-onset LLD subjects. The late-onset group also had more hyperintensities than the EOD subjects. Left anterior cingulate thickness was significantly smaller in the late-onset depressed group than in the EOD                                                            |
| Dillon et al. <sup>22</sup> , 2014   | Argentina       | Hospital-based<br><br>Outpatient clinic<br>Cross-sectional | To investigate subtypes of geriatric depression associated with cognitive impairment                                                        | Major depression disorder (MDD) ( $n: 31$ ),<br>Dysthymia Disorder (DD) ( $n: 31$ ),<br>subsyndromal depression disorder | SCAN ( <i>DSM-IV</i> ) | MMSE, neuropsychological tests                           | DdD group showed a cortical profile in memory (impairment in learning and recognition) while the other depressive groups (MDD, DD, SSD) had a subcortical profile in memory (impairment in memory with                                                                                                                                                                                  |

|                                        |         |                                                |                                                                                                                                                                                                    |                                                                                                    |                           |                                                                                           |                                                                                                                        |
|----------------------------------------|---------|------------------------------------------------|----------------------------------------------------------------------------------------------------------------------------------------------------------------------------------------------------|----------------------------------------------------------------------------------------------------|---------------------------|-------------------------------------------------------------------------------------------|------------------------------------------------------------------------------------------------------------------------|
|                                        |         |                                                |                                                                                                                                                                                                    | (SSD) ( <i>n</i> : 29), depression due to dementia (DdD) ( <i>n</i> : 27)                          |                           |                                                                                           | good recognition).                                                                                                     |
| Dzierzewski et al., <sup>27</sup> 2015 | USA     | Prospective study (8.5 years), community based | Examined the chronic, acute, and longitudinal relationships between depressive symptoms and cognitive functioning in older adults in an ongoing treatment study of major depressive disorder (MDD) | <i>N</i> = 453<br>Age (mean)—70 years                                                              | Clinical interview, MADRS | CERAD battery                                                                             | Increasing age, lower literacy, and chronic levels of depressive symptoms were related to lower cognitive functioning. |
| Klein et al., <sup>17</sup> 2015       | Germany | Cross-sectional Hospital-based                 | To compare clock test deficits in elderly patients with early-onset depression (EOD) and late-onset depression (LOD)                                                                               | EOD ( <i>N</i> = 26)<br>LOD ( <i>N</i> = 27)<br>HC ( <i>N</i> = 32)                                | <i>ICD-10</i>             | Clock drawing tests, clock reading test, clock setting test, Tubingen clock questionnaire | LOD had lower scores on clock drawing tests than EOD and HC.                                                           |
| Callahan et al., <sup>18</sup> 2015    | Canada  | Cross-sectional Hospital Based                 | systematically compare object-based semantic memory performance between individuals with aMCI, aMCI/D+, and LLD                                                                                    | aMCI ( <i>n</i> = 17)<br>aMCI+ Dep ( <i>n</i> = 18)<br>LLD ( <i>n</i> = 15)<br>HC ( <i>n</i> = 29) | <i>DSM-IV-TR</i>          | Semantic battery                                                                          | The performance of aMCI/D+ participants was significantly worse than the three other groups                            |
| Zembaty et al., <sup>20</sup> 2016     | Poland  | Cross-sectional study                          | Assessment of Executive dysfunction in LLD                                                                                                                                                         | LLD ( <i>n</i> = 87)<br>HC ( <i>n</i> = 100)                                                       | <i>DSM-5</i> , <i>GDS</i> | Trail making test, verbal fluency test, and go/no-go test                                 | Depression group had poor psychomotor speed, cognitive flexibility, semantic fluency, and inhibition.                  |

|                                     |                |                                                                  |                                                                                                                                                                                                                                  |                                                 |                                        |                                                                                                                                 |                                                                                                                                                                                                                                 |
|-------------------------------------|----------------|------------------------------------------------------------------|----------------------------------------------------------------------------------------------------------------------------------------------------------------------------------------------------------------------------------|-------------------------------------------------|----------------------------------------|---------------------------------------------------------------------------------------------------------------------------------|---------------------------------------------------------------------------------------------------------------------------------------------------------------------------------------------------------------------------------|
| Hashem et al., <sup>1</sup> 2017    | Egypt          | Hospital-based Cross-sectional                                   | To compare cognitive functions between late-onset (age: 60 years) and early-onset (<60 years) depression in elderly patients                                                                                                     | Late-onset vs. early-onset elderly<br>N = 80    | NA                                     | ACE-III                                                                                                                         | Late-onset had worse performance in memory, fluency, language, and visuospatial skills compared to early-onset.                                                                                                                 |
| Riddle et al., <sup>11</sup> 2017   | USA            | Prospective study<br>Community                                   | to determine whether clinical characteristics could serve as phenotypes informative of subsequent cognitive decline                                                                                                              | Depressed (N = 273) and non-depressed (n = 164) | <i>DSM-IV</i>                          | Neuropsychological assessment                                                                                                   | Depressed older adults performed in episodic memory and working memory at 3 months and 12 months compared to non-depressed even after remission. Early-onset depressed older adults had greater decline compared to late-onset. |
| Victoria et al., <sup>26</sup> 2017 | USA            | DBRCT<br>Hospital-based<br>(secondary analysis of STOP-PD study) | To characterize cognitive function at baseline and investigate the relationship between change in cognition, depression, and psychosis after treatment among older adults with major depressive disorder with psychotic features | Young old (n = 71)<br>Older old (n = 71)        | Psychotic depression ( <i>DSM-IV</i> ) | MMSE<br>Stroop word and color tasks, initiation/perseveration sub-scale of dementia rating scale, Stroop word interference task | Improvement in depressive symptoms was significantly associated with improvement in global cognitive function in young old participants but not in older participants.                                                          |
| Ranjan et al., <sup>19</sup> 2017   | India (Mumbai) | Cross-sectional<br>Outpatient                                    | To assess neuropsychological deficits in older adults with depression                                                                                                                                                            | LLD—30<br>HC—30                                 | <i>ICD-10</i><br><i>GDS</i>            | Luria–Nebraska battery                                                                                                          | Depressive patients showed significant deficits in receptive speech, arithmetic, memory, reading, writing, and expressive speech as compared to normal controls                                                                 |
| Olaya B et al., <sup>25</sup> 2019  | Spain          | Prospective (3 years)<br>Community-based                         | determined whether the course of depression was associated with accelerated decline or deficits in verbal episodic memory and verbal fluency in depressed older                                                                  | Age >60 years<br>N = 1027                       | <i>DSM-IV</i><br><i>TR</i>             | Word list recall, animal naming test                                                                                            | Compared to controls, those with lifetime, remittent, incident, persistent depression were observed to have worse verbal fluency. Remitted and incident depression                                                              |

|                                                                                                                                                                             |  |  |        |  |  |  |                                            |
|-----------------------------------------------------------------------------------------------------------------------------------------------------------------------------|--|--|--------|--|--|--|--------------------------------------------|
|                                                                                                                                                                             |  |  | adults |  |  |  | patients had worse verbal episodic memory. |
| LOD: late-onset depression, EOD: early-onset depression, DEDS: depression-executive dysfunction syndrome, BBRC-Edu: Brief Cognitive Battery-Edu, LLD: late-life depression. |  |  |        |  |  |  |                                            |
